# Supplementary material for: Post-synthetic modification and chemical modulation of the ZIF-8 MOF using 3-mercaptopropionic acid (MPA): a multi-technique study on thermodynamic and kinetic aspects
Source: Royal Society of Chemistry journal article supplement (doi:10.1039/d1me00080b), 2021-12-09
Supplement: d1me00080b1.pdf [file d1me00080b1.pdf]

## Electronic Supplementary Information for

### **Post-synthetic modification and chemical modulation of ZIF-8 MOF using 3-mercaptopropionic acid (MPA): a multi-technique study on thermodynamic and kinetic aspects**

Gustavo M. Segovia,<sup>a,b</sup> Juan A. Allegretto,<sup>a,b</sup> Jimena S. Tuninetti,<sup>a</sup> Lucía B. Pizarro,<sup>a</sup> Agustín S. Picco,<sup>a</sup> Marcelo Ceolín,<sup>a</sup> Tanja U. Lüdtkke,<sup>c</sup> Elisa Bindini,<sup>c</sup> Desiré Di Silvio,<sup>c</sup> Sergio E. Moya,<sup>c</sup> Omar Azzaroni,<sup>a,\*</sup> and Matías Rafti<sup>a,\*</sup>

a) Instituto de Investigaciones Fisicoquímicas Teóricas y Aplicadas (INIFTA), Fac. de Cs. Exactas, Universidad Nacional de La Plata - CONICET, 64 y Diag. 113, (1900) La Plata, Argentina.

(azzaroni@inifta.unlp.edu.ar, mrafti@quimica.unlp.edu.ar)

b) Universidad Nacional de San Martín, Argentina.

c) CIC biomaGUNE, Parque Científico y Tecnológico de Gipuzkoa, Paseo Miramón 182, 20014 Donostia/San Sebastián, Gipuzkoa, Spain.

This supplementary information provides additional data supporting the study of the effect of 3-mercaptopropionic acid on the nucleation and growth mechanism of ZIF-8 colloidal suspensions at room temperature. This document contains 8 pages, including figures covering the following characterization techniques for ZIF-8 nanocrystals and their pre- and post-synthetic functionalization: Dynamic light scattering, Nitrogen adsorption isotherms, zeta-potential, and isothermal calorimetric titration. This document includes 7 figures, 2 tables, 3 additional references, and this cover page.

### Stoichiometric Calculations

20  $\mu\text{L}$  of 10 mM MPA are added to 2 mL of ZIF-8 synthesis mixture with 1:1 volumetric proportion in 25 mM  $\text{Zn}(\text{Ac})_2$  and 50 mM MeImH methanolic solutions. Therefore, the MeImH:MPA molar ratio is:

$$\text{MeImH:MPA} = \frac{1^{-3}\text{L} \times 50^{-3}\text{Mol/L}}{20^{-6}\text{L} \times 10^{-3}\text{Mol/L}} = \frac{250}{1}$$

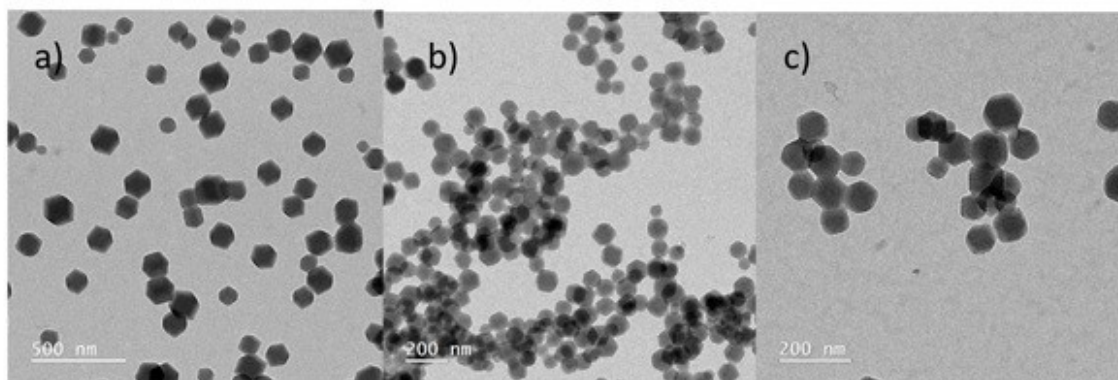

**Figure S1.** TEM images of ZIF-8 crystals a) before reaction b-c) after reaction with MPA.

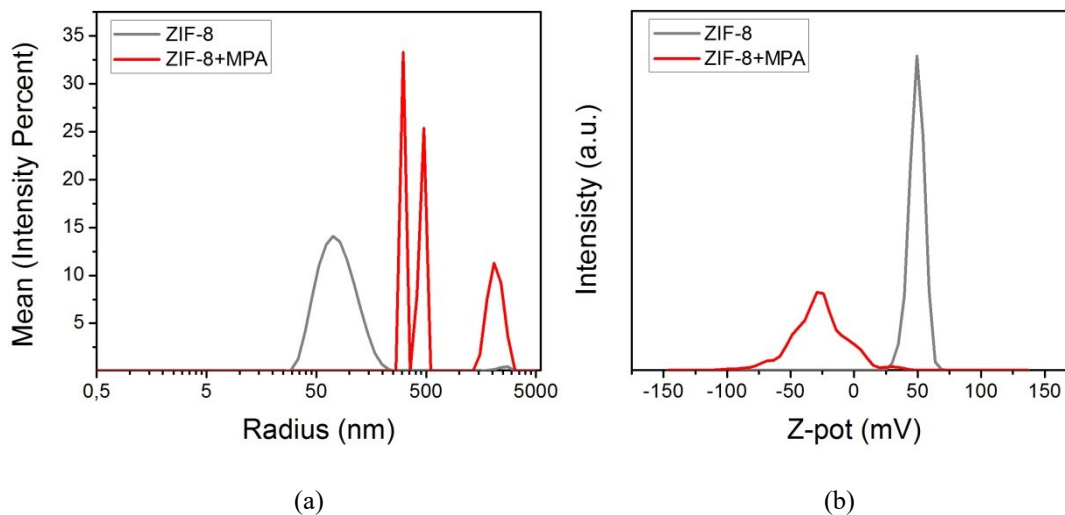

**Figure S2.** (a) DLS size measurement and b) Z-potential measurements for ZIF-8 and ZIF-8+MPA.

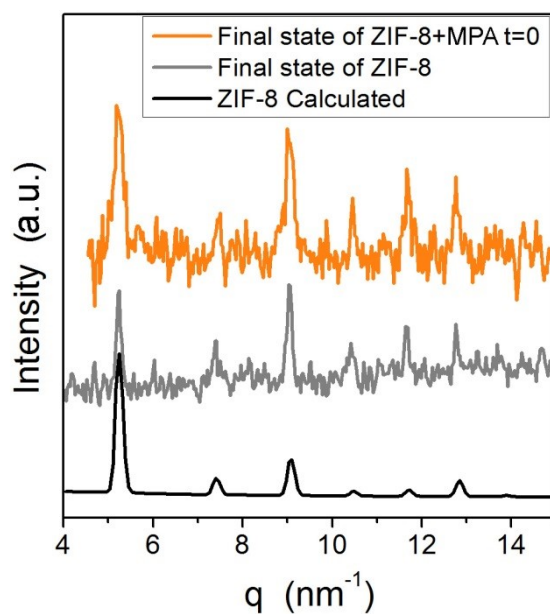

**Figure S3.** WAXS pattern of ZIF-8 and ZIF-8+MPA t=0 nanoparticles obtained for final stage of colloidal synthesis. The theoretical diffraction pattern was calculated using ZIF-8 available data file from Cambridge Crystallographic Data Centre (CCDC).

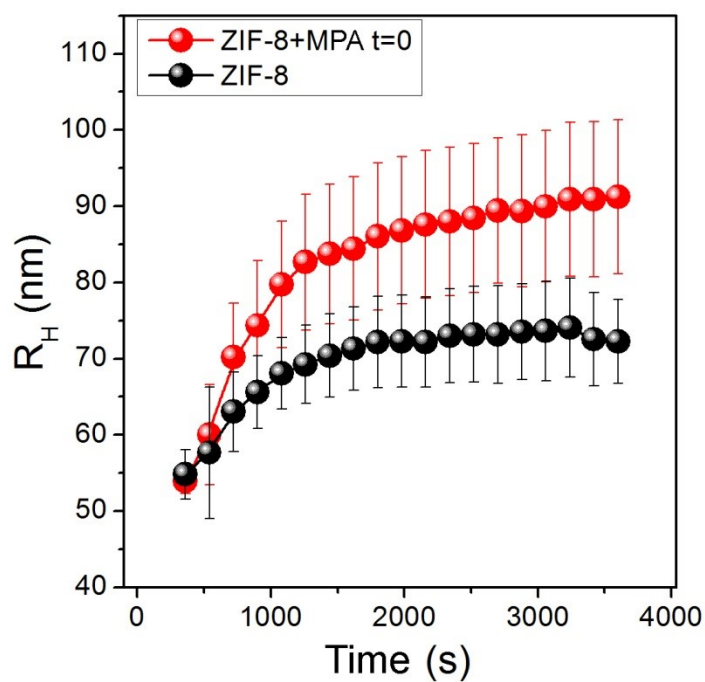

**Figure S4.** Evolution of the hydrodynamic radius of ZIF-8 (black) and ZIF-8+MPA t=0 obtained via DLS.

Fitting the SAXS and DLS data using the following appropriate empiric models confirms that the growth of ZIF-8 would be controlled by the diffusion of the precursors:<sup>1</sup>

Mononuclear growth:

$$\frac{1}{r} = \frac{1}{r_0} - k_m(C)t \quad (S1)$$

where  $k_m$  depends on the solut concentration.

Polinuclear growth:

$$r = r_0 + k_p t \quad (S2)$$

Growth controlled by diffusion of precursors:

$$r^2 = r_0^2 + k_D t \quad (S3)$$

where  $k_D$  depends on the diffusion coefficient.

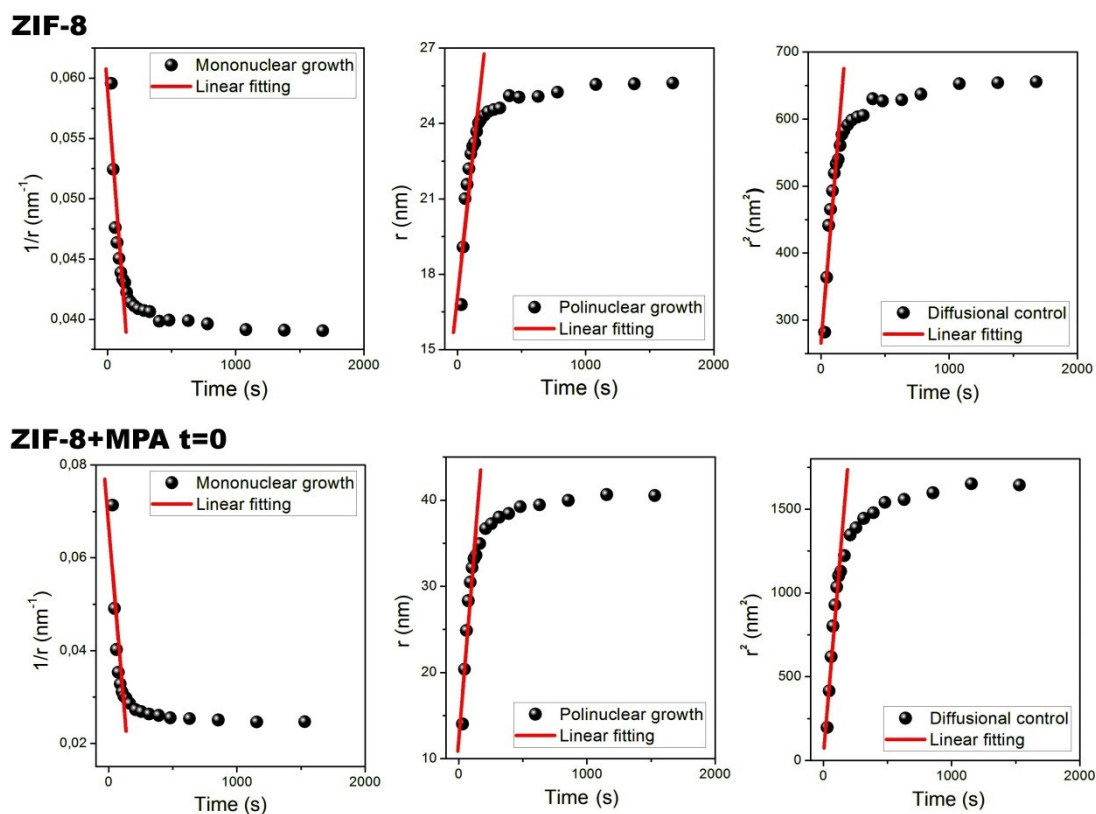

**Figure S5.** Linear fitting for the experimental results of the ZIF-8 and ZIF-8+MPA t=0 growth determined via SAXS using different empiric models (equations 3.10-3.12).

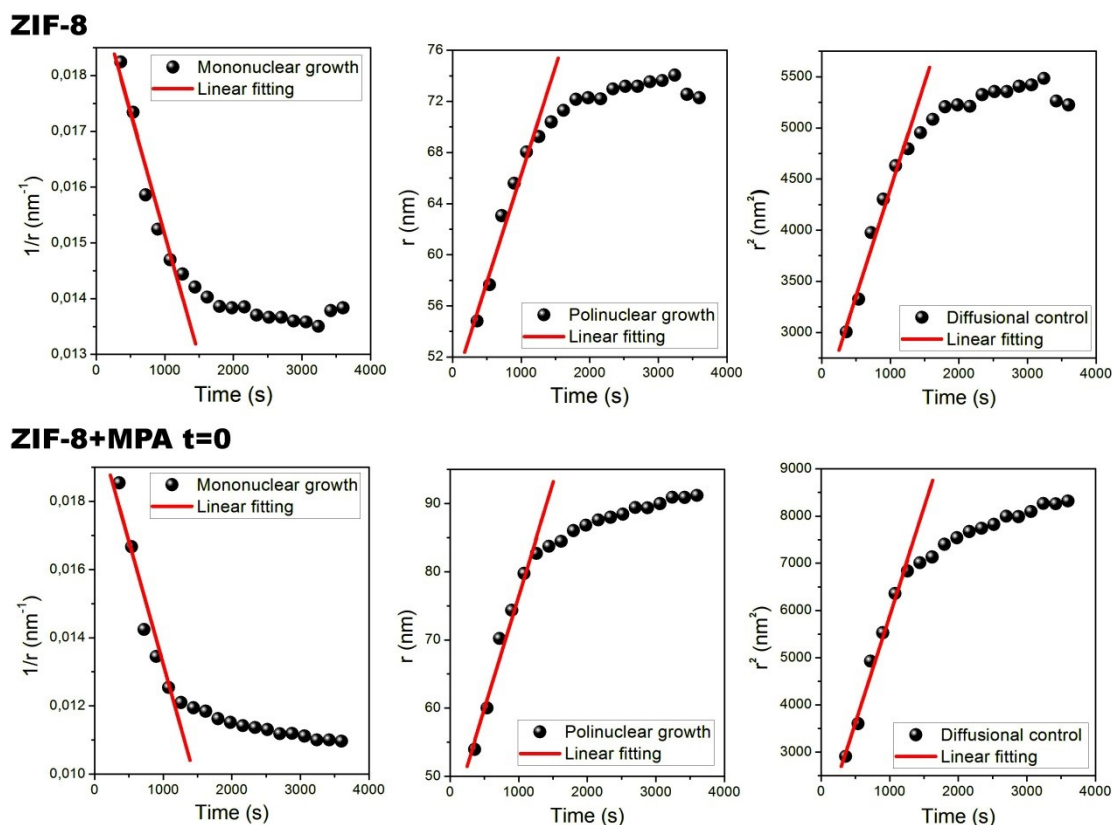

**Figure S6.** Linear fitting of the experimental data obtained for the ZIF-8 and ZIF-8+MPA t=0 growth determined via DLS using different empiric models (equations 3.10-3.12).

**Table S1.** Values of the correlation coefficients of the fittings done for the ZIF-8 and ZIF-8+MPA t=0 growths obtained from the SAXS and DLS measures, using the empiric models proposed (equations S2-S5).

| ZIF-8               |                       |                      |
|---------------------|-----------------------|----------------------|
| Model               | R <sup>2</sup> (SAXS) | R <sup>2</sup> (DLS) |
| Mononuclear         | 0.78971               | 0.93998              |
| Polinuclear         | 0.84081               | 0.96048              |
| Diffusional control | 0.87957               | 0.96877              |
| ZIF-8+MPA t=0       |                       |                      |
| Mononuclear         | 0.7241                | 0.92687              |
| Polinuclear         | 0.88977               | 0.96844              |
| Diffusional control | 0.94134               | 0.98159              |

**Table S2.** Summary of the elemental proportions determined through processing of the XPS spectra for ZIF-8+MPA t=0. The theoretical S:Zn% was calculated assuming the thiol homogenously distributed in the whole ZIF-8 crystals.

| ZIF-8+MPA t=0 |              |                    |                   |
|---------------|--------------|--------------------|-------------------|
| Name          | ratio Zn:N:C | Experimental S:Zn% | Theoretical S:Zn% |
| Zn 2p         | 1            |                    |                   |
| N 1s          | 3.53         |                    |                   |
| C 1s          | 12.97        |                    |                   |
| S 2p          |              | 17.68              | 0.8               |

## N<sub>2</sub> adsorption experiments

Bare (Fig. S7-upper panel) and MPA-modified (Fig. S7-lower panel) ZIF-8 samples were exchanged with fresh solvent and dried under vacuum at 200 °C for 12 hours. BET surface area was determined from the isotherms (duplicated experiments) in the  $p/p_0$  range which ensured fulfillment of Rouquerol's criteria (0,005 - 0,07) using the software included in the ASAP 2020 apparatus.<sup>2</sup> Regions associated with hysteresis loop are displayed in an enlarged area in the insets.

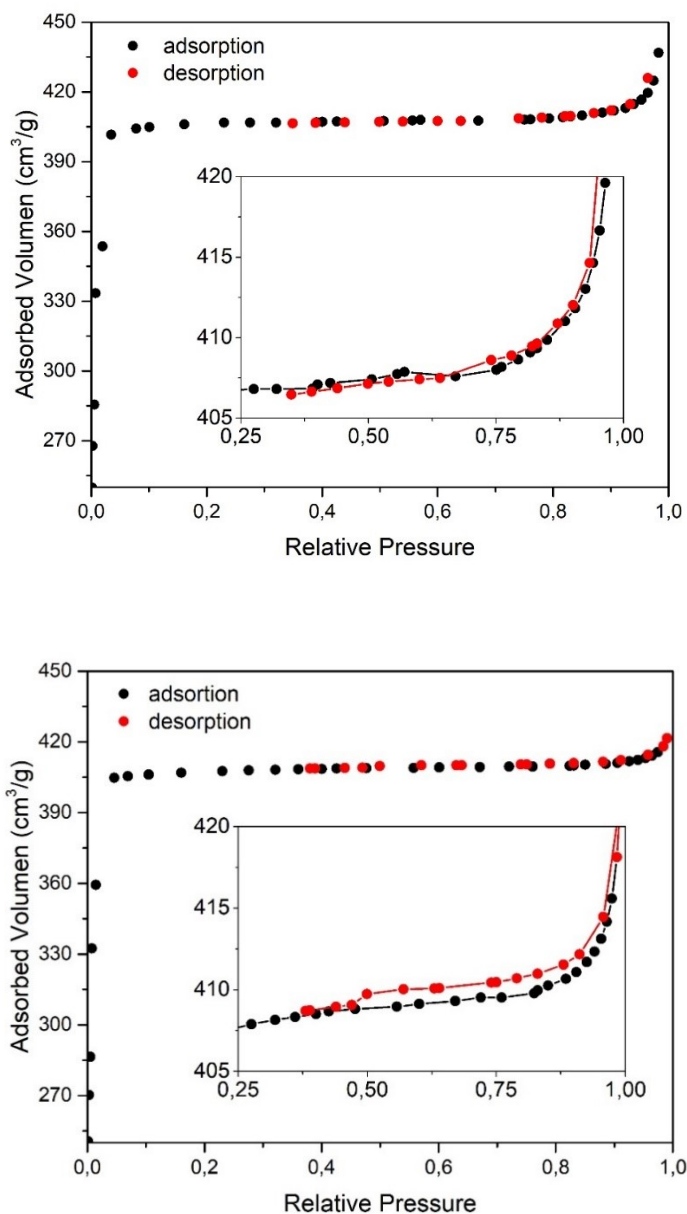

**Fig. S7.** Nitrogen adsorption isotherm corresponding to bare ZIF-8 (**Top**) and MPA-modified material (**bottom**). Both isotherms are typical for microporous materials, but insets show the appearance of a hysteresis loop between adsorption and desorption branches ascribable to the formation of mesopores arising from coordinative etching upon MPA modification.

## Calculations

First of all, an estimation of the energy involved in the Zn-carboxylic acid coordination process would not be possible if ITC experiments would be carried during ZIF-8 formation (i.e., if MPA would be included with MOF precursors) due to the considerable high enthalpies related to nucleation/growth process (around 70 kJ/mol).<sup>3</sup>

Taking into account that the moles of MPA are  $200 \mu\text{L} \times 0.8190 \text{ mM} = \mathbf{1.638 \times 10^{-7}}$  moles, it is important to estimate the moles of unsaturated  $\text{Zn}^{2+}$  ions on the ZIF-8 crystal surface. These depend on the crystalline phase exposed on the crystal surface and the size of the crystals. In this case, we will estimate the number of  $\text{Zn}^{2+}$  moles on the crystal surface assuming that the crystals are spherical and they expose the (100) crystal plane (which contains 4  $\text{Zn}^{2+}$  ions).<sup>4</sup> Additionally, we will consider that the lattice parameter of ZIF-8 unit cell ( $a = 16.992 \text{ \AA}$ ) and this has 12  $\text{Zn}^{2+}$  ions ( $\text{Zn}_{12}\text{N}_{48}\text{C}_{96}$ ).<sup>5</sup>

How many  $\text{Zn}^{2+}$  ions are there on the ZIF-8 crystal surface?

$$\frac{\text{Sphere area}}{\text{Unit cell area}} \cdot \frac{4 \text{ Zn}^{2+}}{6.023 \times 10^{23} \text{ moles}}$$

For ZIF-8 crystals ( $r = 50 \text{ nm}$ ):  $7.2 \times 10^{-20}$  moles  $\text{Zn}^{2+}$

How many ZIF-8 particles are there into the colloidal dispersion?

$$\frac{\frac{7.9 \text{ mM} \times 1.456 \text{ mL}}{\text{Sphere volume}}}{\frac{12 \text{ Zn(HmimH)}_2}{6.023 \times 10^{23} \text{ moles}}}$$

For ZIF-8 crystals ( $r = 50 \text{ nm}$ ):  $5.4 \times 10^{12}$

So, the number of  $\text{Zn}^{2+}$  moles on the ZIF-8 surface particles is:

For ZIF-8 crystals ( $r = 50 \text{ nm}$ ):  $\mathbf{3.9 \times 10^{-7} \text{ Zn}^{2+} \text{ moles}}$

This value is slightly lower than the number of MPA moles used ( $1.638 \times 10^{-7}$  moles).

## References

- 1 A. P.C., *Introduction to Sol-Gel Processing (The International Series in Sol-Gel Processing: Technology & Applications)*, 1998.
- 2 D. A. Gómez-Gualdrón, P. Z. Moghadam, J. T. Hupp, O. K. Farha and R. Q. Snurr, *J. Am. Chem. Soc.*, 2016, **138**, 215–24.
- 3 J. Cravillon, C. A. Schröder, H. Bux, A. Rothkirch, J. Caro and M. Wiebcke, *CrystEngComm*, 2012, **14**, 492–498.
- 4 Z. Li and H. C. Zeng, *Chem. Mater.*, 2013, **25**, 1761–1768.

5 F. Paquin, J. Rivnay, A. Salleo, N. Stingelin and C. Silva, *J. Mater. Chem. C*, 2015, **3**, 10715–10722.
